# Supplementary material for: Probing the prostate tumour microenvironment I: impact of glucose deprivation on a cell model of prostate cancer progression
Source: PubMed Central journal article supplement (PMC5362412; doi:10.18632/oncotarget.14605), 2017-01-12
Supplement: oncotarget-08-14374-s001.pdf [file oncotarget-08-14374-s001.pdf]

## Probing the prostate tumour microenvironment I: impact of glucose deprivation on a cell model of prostate cancer progression

### Supplementary Material

**Supplementary Data Table S1:** Significantly Changing Proteins As Result of Low Glucose Conditions.

For Data Table S1, please see the attached file

**Supplementary Data Table S2:** Common Significantly Changing Proteins Between Androgen Sensitive and Androgen Independent Cell Lines.

For Data Table S2, please see the attached file

**Supplementary Data Table S3:** Transition List for Hx Panel.

For Data Table S3, please see the attached file

**Supplementary Data Table S4:** Transition List for AS Panel

For Data Table S4, please see the attached file
